# Supplementary material for: Early immune responses have long-term associations with clinical, virologic, and immunologic outcomes in patients with COVID-19
Source: Res Sq. 2022 Feb 2:rs.3.rs-847082. Preprint. [Version 1] doi: 10.21203/rs.3.rs-847082/v1 (PMC8820672; doi:10.21203/rs.3.rs-847082/v1)
Supplement: Supplement 1 [file 55937bf8514b5e8fb341a775.csv]

gene	overall_p_value_linear_regression	quadratic_p_value_linear_regression	overall_FDR_linear_regression	overall_p_value_mixed_model	overall_FDR_mixed_model
GO_activated dendritic cells (M67)	1.17571660060014e-08	0.212306602036007	5.07517665925727e-07	7.06312318011141e-09	1.82934890364886e-07
GO_antiviral IFN signature (M75)	6.95680412844884e-09	0.702976457487184	3.6036245385365e-07	3.0385188343302e-09	9.5415810163307e-08
GO_ATF targets network (M41.4)	0.0200982429383192	0.106736875769821	0.0941398064368393	0.0191174399049265	0.0718746539062566
GO_axon guidance (M110)	0.160936006314535	0.16297430405379	0.311062877876601	0.181120153794228	0.287792146212914
GO_B cell development (M9)	0.246346500137459	0.273633033522125	0.385723452769578	0.129554269262504	0.23464724292999
GO_B cell development/activation (M58)	0.479797133409638	0.254353306617804	0.606182719771201	0.557463891232068	0.621132518171631
GO_B cell surface signature (S2)	0.00775892792981509	0.0618423740349224	0.0574160666806317	0.00768227168783761	0.0397941673429988
GO_BCR signaling (M54)	0.233270869793609	0.105169013742982	0.377607220478405	0.226393807996335	0.331276815090682
GO_blood coagulation (M11.1)	0.499578311096034	0.2418047852055	0.614727212061786	0.417000349816476	0.507056763391865
GO_CCR1, 7 and cell signaling (M59)	0.115384275539376	0.17849310834391	0.246979564997507	0.0787956671948929	0.170067315028977
GO_CD1 and other DC receptors (M50)	6.82400459516394e-05	0.9139541392992	0.00110463574384216	1.06394623860936e-05	0.000145032671473592
GO_CD28 costimulation (M12)	0.10433585150941	0.616983172099808	0.232526814012781	0.00452880831414465	0.0279276512705587
GO_cell adhesion (GO) (M117)	0.539988821092993	0.27597502035244	0.646265138804843	0.371230656627588	0.464486666988141
GO_cell adhesion (M51)	0.00339500731227294	0.702373719586526	0.0337341070498986	0.00127390258784376	0.0105633436991259
GO_cell adhesion, membrane (M133.0)	0.303259400421603	0.165446927099325	0.443752455984154	0.249020440645014	0.346754269500315
GO_cell cell adhesion (M133.1)	0.32144172121016	0.277729947368912	0.45696480870854	0.32287255184554	0.413980153108885
GO_cell cycle (I) (M4.1)	0.191637360917369	0.148977120982997	0.341706517452843	0.0973819322881985	0.192533743989644
GO_cell cycle (II) (M4.10)	0.114416807660325	0.0795751689692731	0.246949609866868	0.0670218712384616	0.154988077238942
GO_cell cycle (III) (M103)	0.0783193782700523	0.0484931999985999	0.196939019145083	0.0440287698300767	0.117542222245753
GO_cell cycle and growth arrest (M31)	0.295179543640701	0.430288545620991	0.435919571548242	0.140448407459321	0.244656640540018
GO_cell cycle and transcription (M4.0)	0.158025215361137	0.0670373241318532	0.308896880282937	0.0953237585936116	0.191687391141233
GO_cell cycle, ATP binding (M144)	0.185364499865263	0.670846523076547	0.333398649063216	0.185130965541519	0.290599515607597
GO_cell cycle, mitotic phase (M230)	0.679931964989392	0.444410034534714	0.749371825243628	0.670314094788981	0.720379047926747
GO_cell development (M175)	0.214811567349333	0.146111771736354	0.361273999632969	0.234307180320115	0.335279335375192
GO_cell division (M37.3)	0.27749443101059	0.210579061572328	0.417854986231063	0.212839111365834	0.318692194317374
GO_cell junction (GO) (M4.13)	0.221137120985782	0.24862099586869	0.363067552591488	0.0710744517281653	0.160072026066042
GO_cell junction (M162.1)	0.0906378259999087	0.0310266144580326	0.210156625634546	0.089000853357588	0.182485992371108
GO_chemokine cluster (I) (M27.0)	0.0423355852470806	0.12782730926782	0.137061457237423	0.0517267460063751	0.131345364859325
GO_chemokine cluster (II) (M27.1)	1.61035865232151e-05	0.449117306018325	0.000278055260634181	2.40134225884879e-07	4.20750120598431e-06
GO_chemokines and receptors (M38)	0.00271299363600231	0.0793019320315774	0.028218974446127	0.0012507338688774	0.0105633436991259
GO_chromosome Y linked (M240)	0.713464998585404	0.465679999441615	0.778775855570981	0.200636293874708	0.311166467745804
GO_collagen, TGFB family et al (M77)	0.107420247291207	0.38102438103096	0.233797008810274	0.119044997530416	0.21924205051293
GO_complement activation (I) (M112.0)	0.0308010233064278	0.681074664844427	0.115615435309635	0.000164107353110551	0.00163476170983202
GO_complement activation (II) (M112.1)	0.0907641242965484	0.18888846394934	0.210156625634546	0.111334921003613	0.210825391321333
GO_CORO1A-DEF6 network (I) (M32.2)	0.327762292851742	0.309633365849674	0.45696480870854	0.279582661998923	0.375191240713581
GO_CORO1A-DEF6 network (II) (M32.4)	0.623821652679661	0.366931783899518	0.702477426278401	0.583314602937394	0.642887158131001
GO_cytokines - recepters cluster (M115)	0.0228571377698035	0.0469032680274336	0.0999715660854375	0.0137493498338663	0.0596685628808229
GO_cytoskeletal remodeling (M32.8)	0.0382353259097432	0.143072743381659	0.1286097326055	0.030221821649287	0.0954567293556748
GO_DC surface signature (S5)	0.849512817674445	0.707428762752021	0.876588923417057	0.316810769302527	0.410269946246772
GO_DNA repair (M76)	0.363456568417754	0.198529046302613	0.490975355539067	0.386324933247692	0.476467417672153
GO_double positive thymocytes (M126)	0.177631482824136	0.712475674190868	0.33098240324785	0.379494016195331	0.470282058347324
GO_E2F1 targets (Q3) (M10.0)	0.0707078851353024	0.0505801723414324	0.186870839286156	0.0255190938542641	0.0887955034309109
GO_E2F1 targets (Q4) (M10.1)	0.132736583098267	0.0678666266237011	0.270699015924812	0.0727298577289742	0.161000283348755
GO_endoplasmic reticulum (M37.2)	0.554532547749556	0.305806156426982	0.655817031356781	0.233354913140888	0.335279335375192
GO_enriched for cell migration (M122)	0.15145662979772	0.0782196003441617	0.299444787157324	0.150024746457679	0.254366804517808
GO_enriched for SMAD2/3 signaling (M97)	0.0338558361436955	0.656445533653621	0.121786966128016	0.048520155996169	0.124422974287206
GO_enriched for TF motif PAX3 (M179)	0.375008642622918	0.724307628966189	0.492553201733564	0.526936830039362	0.595967855808711
GO_enriched for ubiquitination (M138)	0.0292452434627979	0.570280183064631	0.11476542510401	0.0294987700001821	0.095082199255641
GO_enriched in B cells (I) (M47.0)	0.0903513904228082	0.955785731793682	0.210156625634546	0.00138138392828298	0.0108417708310695
GO_enriched in B cells (II) (M47.1)	0.0172488876420968	0.32336084078606	0.0859127288327514	0.000140486170234079	0.00145543672362506
GO_enriched in B cells (III) (M47.2)	1.62797953783789e-06	0.000589099252219706	3.51372250250011e-05	8.87493304259732e-11	5.74651914508176e-09
GO_enriched in B cells (IV) (M47.3)	5.73684927819388e-08	0.000111526182261974	1.85730495381527e-06	5.86943881336837e-13	1.52018465266241e-10
GO_enriched in B cells (V) (M47.4)	0.102624699409893	0.218655308739304	0.2317446722143	0.00659626216707896	0.0355923312765302
GO_enriched in B cells (VI) (M69)	0.250724056385657	0.567310579912591	0.385723452769578	0.0104893228334038	0.0485131181044928
GO_enriched in cell cycle (M167)	0.120941033855575	0.339396106237792	0.252610707811241	0.0849590042514175	0.180363787714075
GO_enriched in dendritic cells (M168)	0.709669773055639	0.512298453356528	0.778775855570981	0.653411195659566	0.708089956802626
GO_enriched in membrane proteins (M124)	0.375490771533769	0.937934093298678	0.492553201733564	0.0236641671424376	0.0863242153505822
GO_enriched in monocytes (I) (M4.15)	0.614236582385593	0.777063298238565	0.700824999285765	0.311575833397378	0.407566367928894
GO_enriched in monocytes (II) (M11.0)	0.322126807697375	0.276811894142669	0.45696480870854	0.213097362475274	0.318692194317374
GO_enriched in monocytes (III) (M73)	0.0161956086272965	0.248500272517665	0.0822482869503881	0.00530784201707938	0.0312438882368991
GO_enriched in monocytes (IV) (M118.0)	0.40764845212352	0.202166569167508	0.526675068455808	0.268435873366252	0.365180866349894
GO_enriched in neutrophils (I) (M37.1)	0.23024410330662	0.187100320672871	0.375051715449148	0.13613151827618	0.241493583791306
GO_enriched in neutrophils (II) (M163)	0.718638723866658	0.626230837977164	0.778775855570981	0.499341188248907	0.569732897605581
GO_enriched in NK cells (I) (M7.2)	0.0874830740431475	0.0834373868150709	0.210156625634546	0.089481548382744	0.182485992371108
GO_enriched in NK cells (II) (M61.0)	0.171618018574643	0.109845026211223	0.322094687035018	0.250672949148896	0.347188737056492
GO_enriched in NK cells (III) (M157)	0.059882971195295	0.106897131643342	0.169844956096127	0.0532052264567914	0.132501477426048
GO_enriched in T cells (I) (M7.0)	0.750881494000722	0.586735175602252	0.800322250807354	0.74813212275634	0.790882529770988
GO_enriched in T cells (II) (M223)	0.973395268855157	0.826052862214625	0.977168118734441	0.863776742806066	0.887770541217345
GO_erythrocyte differentiation (M173)	0.0285080308095088	0.0424945896693786	0.113593538148658	0.0372852928010494	0.106119679510679
GO_extracellular matrix (I) (M2.0)	0.0106205088515976	0.180983090558182	0.0685133773682342	0.0111489249630512	0.0506591502707066
GO_extracellular matrix (II) (M2.1)	0.0160455315602644	0.874218337258044	0.0822482869503881	0.0127404260558515	0.056892592214923
GO_extracellular matrix (III) (M2.2)	0.0212110065266188	0.111890531400631	0.0947181153516253	0.0262793823126358	0.0887955034309109
GO_golgi membrane (I) (M113)	0.0716285537350423	0.100230927624457	0.187391872902787	0.0969727476883696	0.192533743989644
GO_golgi membrane (II) (M237)	0.214785215676542	0.6148910148128	0.361273999632969	0.122451111058722	0.223343927916966
GO_heme biosynthesis (I) (M171)	0.212430485674808	0.0990995545884235	0.361273999632969	0.269033708102287	0.365180866349894
GO_heme biosynthesis (II) (M222)	0.328167777682581	0.140928666223183	0.45696480870854	0.393922469684676	0.4835351642101
GO_Hox cluster I (M17.0)	0.0824749290482399	0.351660960185211	0.205394294456674	0.115750392704253	0.21724167906088
GO_Hox cluster II (M17.1)	0.0603310268758443	0.259848187735397	0.169844956096127	0.0580543231761486	0.141849714175684
GO_Hox cluster III (M17.2)	0.0271711520893578	0.324515379337847	0.10995825611162	0.036625227178549	0.105399264880491
GO_Hox cluster IV (M17.3)	0.203704792647596	0.276941618934597	0.357722751689834	0.22305359425363	0.328243641543695
GO_Hox cluster V (M96)	0.0667377575550297	0.223427727661312	0.181948202176344	0.102354832873018	0.199481444034946
GO_Hox cluster VI (M107)	0.0564530788397037	0.407403690444117	0.168061464591762	0.060654237310876	0.145591979815082
GO_IL2, IL7, TCR network (M65)	0.899513397765932	0.797560317558598	0.913813658451454	0.993006248377092	0.993006248377092
GO_inflammatory response (M33)	0.180070120232941	0.451385796181004	0.332908557576916	0.144293417234318	0.249146633757923
GO_innate antiviral response (M150)	7.07562528921936e-10	0.62155974225004	9.16293474953907e-08	3.89410709805136e-10	1.68095623065884e-08
GO_inositol phosphate metabolism (M129)	0.0842720419181636	0.562540209891131	0.20787103673147	0.0404062955750203	0.110364994207434
GO_integrins and cell adhesion (M84)	0.796506250834788	0.500619689573181	0.835202910794373	0.547656862782172	0.614039512816374
GO_intracellular transport (M147)	0.52647241198438	0.364858972931261	0.637179227588572	0.428375986751499	0.515835538754072
GO_KLF12 targets network (M32.3)	0.549979861372503	0.39835289391651	0.653416440804946	0.544069348168479	0.612669396415808
GO_leukocyte differentiation (M160)	0.354948692626228	0.768189115081954	0.483851112579963	0.140748414828041	0.244656640540018
GO_leukocyte migration (M88.0)	0.118694603155763	0.164762807571944	0.249934164368639	0.133913463371479	0.239197151815262
GO_lymphocyte generic cluster (M60)	0.487167843540549	0.511651254831898	0.606617651331741	0.207871321509685	0.316698072182402
GO_lysosomal/endosomal proteins (M139)	0.25297902453782	0.147130584408689	0.385723452769578	0.215332563727955	0.318692194317374
GO_lysosome (M209)	0.147520669847518	0.0862294114888502	0.293906565311594	0.063501941124415	0.149518206829304
GO_MAPK, RAS signaling (M100)	0.320994867258007	0.347029506078133	0.45696480870854	0.314060641263973	0.408752291896327
GO_Membrane, ER proteins (M134)	0.315608542651344	0.216635203256056	0.45696480870854	0.284980653992236	0.378512766071739
GO_Memory B cell surface signature (S9)	0.00351668297431375	0.190162308248908	0.0337341070498986	0.00346297937647558	0.0227462742893217
GO_metabolism of steroids (M225)	0.0139047832908333	0.250508676704231	0.0817148177129028	0.0140673252754968	0.0596685628808229
GO_MHC-TLR7-TLR8 cluster (M146)	0.458744031841278	0.314028531625389	0.585294109590596	0.119355710897	0.21924205051293
GO_mismatch repair (I) (M22.0)	0.376546463101335	0.169433465728249	0.492553201733564	0.299495111033549	0.393752455622787
GO_mismatch repair (II) (M22.1)	0.367016503582798	0.185839195097329	0.490975355539067	0.287825542865101	0.380340895928883
GO_mitochondrial cluster (M235)	0.768305016194685	0.484116552265113	0.812208159977238	0.817831678715122	0.847273619148866
GO_mitotic cell cycle (M4.7)	0.0908785408149388	0.129512760107115	0.210156625634546	0.0693010073415331	0.157447025451378
GO_mitotic cell division (M6)	0.347127928007746	0.262990851285201	0.475693827269874	0.26930326437386	0.365180866349894
GO_Monocyte surface signature (S4)	0.590386769631125	0.308619575848252	0.682634702385988	0.488388342479899	0.56218924756575
GO_Naive B cell surface signature (S8)	0.0183512895741393	0.087853748102161	0.0880182222167052	0.0191480738205857	0.0718746539062566
GO_NK cell surface signature (S1)	0.0359004034217831	0.0436227446579171	0.124177315548344	0.00313433360570001	0.0213629579967448
GO_nuclear pore complex (M106.0)	0.0106467746772843	0.896348924619427	0.0685133773682342	0.00849410647630387	0.042307184180052
GO_nucleotide metabolism (M181)	0.0526927076609439	0.0612809148937549	0.158690828885866	0.0463368034041582	0.121224566481586
GO_olfactory receptors (M228)	0.205794169891063	0.246297526124615	0.357722751689834	0.20503370348218	0.316093626201693
GO_Plasma cell surface signature (S3)	0.00472282890856848	0.671003281622675	0.0407737562439745	0.00302298181333236	0.0211608726933265
GO_platelet activation (I) (M32.0)	0.106664592579971	0.0969307473569533	0.233797008810274	0.102436417207134	0.199481444034946
GO_platelet activation (II) (M32.1)	0.184739186827016	0.190872307506957	0.333398649063216	0.179185998170416	0.286476379790974
GO_platelet activation (III) (M42)	0.510695797843954	0.247682672643024	0.623916092648982	0.482325319722476	0.557688650929113
GO_PLK1 signaling events (M4.2)	0.217547277384614	0.212677846969508	0.363067552591488	0.109442281192077	0.210825391321333
GO_proteasome (M226)	0.0298516059781295	0.639794074582118	0.115396506691575	0.0343232671441918	0.101019615799383
GO_putative targets of PAX3 (M89.0)	0.145557148613652	0.242391620632229	0.292242647216557	0.0142835942031314	0.0596685628808229
GO_putative targets of PAX3 (M89.1)	0.0182016991378603	0.216763797084152	0.0880182222167052	0.0010219987748318	0.00912750629935986
GO_Ran mediated mitosis (M15)	0.248584276001909	0.152504422909982	0.385723452769578	0.159446030221142	0.262542847433829
GO_receptors, cell migration (M109)	0.0152423358209366	0.0900401404807352	0.0822451037004704	0.00605621631774052	0.0333736175807403
GO_recruitment of neutrophils (M132)	0.333717933859628	0.1833391152389	0.462208261334993	0.158248499780453	0.262542847433829
GO_Rho GTPase cycle (M4.14)	0.144874526351279	0.164852055535554	0.292242647216557	0.0342379410101194	0.101019615799383
GO_RIG-1 like receptor signaling (M68)	3.08530477203985e-09	0.986788112713618	2.6636464531944e-07	1.0438832525326e-09	3.86236803437061e-08
GO_signaling in T cells (I) (M35.0)	0.00195292739873134	0.0355462822680264	0.0229912816487008	8.81133188427437e-05	0.00108673093239384
GO_signaling in T cells (II) (M35.1)	0.0854716166528332	0.0822039620446786	0.20884102559513	0.0879323843408639	0.18219590035427
GO_spliceosome (M250)	0.576349086516647	0.790048769271967	0.669391988375837	0.877682915280521	0.897672792947898
GO_suppression of MAPK signaling (M56)	0.54146538656622	0.386141031216666	0.646265138804843	0.430194889462855	0.515835538754072
GO_T cell activation (I) (M7.1)	0.959004291006047	0.779731641584141	0.966467359418545	0.700923696943798	0.747075051475077
GO_T cell activation (II) (M7.3)	0.247279403994204	0.191602691142952	0.385723452769578	0.281288164538728	0.375534199049127
GO_T cell activation (III) (M7.4)	0.992348307778065	0.933586821714935	0.992348307778065	0.768973578077878	0.809610393179555
GO_T cell activation (IV) (M52)	0.0304230821421585	0.188241675786873	0.115615435309635	0.0188976366963145	0.0718746539062566
GO_T cell differentiation (M14)	0.670846784218607	0.473740734037795	0.742518449199227	0.558779446849382	0.621132518171631
GO_T cell differentiation (Th2) (M19)	0.913181367919448	0.695877954701411	0.923882712074754	0.662187577217827	0.714610760414239
GO_T cell surface signature (S0)	0.71644748756489	0.731143486250411	0.778775855570981	0.971599877457657	0.981525331438194
GO_T cell surface, activation (M36)	0.89457863953136	0.663950207868638	0.913813658451454	0.880343202350448	0.897672792947898
GO_targets of FOSL1/2 (M0)	0.218923270759018	0.258737466500096	0.363067552591488	0.274849422924649	0.370760419466063
GO_TLR and inflammatory signaling (M16)	0.46235722902199	0.310235613031155	0.587012364297526	0.343801368202822	0.436492913551621
GO_TLR8-BAFF network (M25)	0.638626948602172	0.477929029445365	0.712949912448114	0.447271468303471	0.531391331608253
GO_translation initiation (M227)	0.408732389033272	0.300512290290963	0.526675068455808	0.471286490330063	0.549834238718406
GO_transmembrane transport (I) (M87)	0.831130987113357	0.979889854312014	0.861051702649438	0.475337560001731	0.552073668342817
GO_transmembrane transport (II) (M191)	0.00567987329918246	0.0387173533254402	0.045971474515258	0.00527660285876992	0.0312438882368991
GO_type I interferon response (M127)	5.92494815600359e-10	0.71512444049732	9.16293474953907e-08	3.41484196358272e-10	1.68095623065884e-08
GO_Wnt signaling pathway (M206)	0.00689508604129532	0.267034094078184	0.0525243319028085	0.00677250685590003	0.0357975362383287
GO_xenobiotic metabolism (M164)	0.0695239183997859	0.0358793163779535	0.185636029541696	0.0683095279228071	0.15656785603546
olink_IL8_P10145_OID00471	0.166268238428558	0.334906454425589	0.591908729840341	0.00171305547821821	0.012123161845852
olink_VEGFA_P15692_OID00472	0.430429378042987	0.955685697145575	0.899988699544427	0.0585896643743728	0.196009058997902
olink_CD8A_P01732_OID05124	0.675840616627466	0.560303079348062	0.922225069778665	0.357224731901048	0.614292996913951
olink_MCP-3_P80098_OID00474	0.368839351911513	0.23531763143421	0.83959876095446	0.0417450645718373	0.144926261909775
olink_GDNF_P39905_OID00475	0.544062073456302	0.392438146760008	0.907579461752189	0.576383690263562	0.746572113114126
olink_CDCP1_Q9H5V8_OID00476	0.762794245818418	0.970322982312764	0.935694274870593	0.589983890135202	0.753868304061647
olink_CD244_Q9BZW8_OID00477	0.0617644518934676	0.0567298314224355	0.385161249010356	0.02082930190881	0.0884453394947959
olink_IL7_P13232_OID00478	0.879623963612087	0.662774869799928	0.960469886939763	0.968366328258535	0.976403032464955
olink_OPG_O00300_OID00479	0.0122376513574377	0.529687291604397	0.136092398018328	1.06395271422453e-07	3.91534598834629e-06
olink_LAP TGF-beta-1_P01137_OID00480	0.17873162283146	0.086617234484085	0.591908729840341	0.172910217194812	0.413188051478512
olink_uPA_P00749_OID00481	0.477290333376253	0.389335488403105	0.907579461752189	0.00155320336989515	0.0114315768024283
olink_IL6_P05231_OID00482	0.0240218210860511	0.0570568533132743	0.184167294993058	0.00034219604825813	0.00331389857260504
olink_IL-17C_Q9P0M4_OID00483	0.937922005461383	0.730202298194317	0.980407645012657	0.862146856903663	0.936754545077706
olink_MCP-1_P13500_OID00484	0.00147554724376684	0.679450866050367	0.0301667436503443	7.83849000152914e-06	0.00018028527003517
olink_IL-17A_Q16552_OID00485	0.80539774089767	0.518940325936281	0.960469886939763	0.703865904943297	0.843534143223211
olink_CXCL11_O14625_OID00486	7.01943671739922e-06	0.886354547389744	0.000645788178000728	2.7132582224402e-11	2.49619756464498e-09
olink_AXIN1_O15169_OID00487	0.326425797169891	0.92359099337957	0.800831289056799	0.465823503001164	0.699498453643027
olink_TRAIL_P50591_OID00488	0.00255720774136976	0.129821827343102	0.0470526224412036	0.00233098976475259	0.0158852635820177
olink_IL-20RA_Q9UHF4_OID00489	0.0654928385641661	0.0919334474053806	0.385161249010356	0.094764245367555	0.276771764248097
olink_CXCL9_Q07325_OID00490	0.550540009923492	0.695890711501819	0.907579461752189	0.0168228822561219	0.0771106037540872
olink_CST5_P28325_OID00491	0.323143322381842	0.61758706074256	0.800831289056799	0.0380630433265523	0.140071999441712
olink_IL-2RB_P14784_OID00492	0.268291685357251	0.161705391864686	0.747964017620037	0.223969757458056	0.463038599688565
olink_IL-1 alpha_P01583_OID00493	0.857506707990563	0.89830040388784	0.960469886939763	0.846153335355057	0.936754545077706
olink_OSM_P13725_OID00494	0.774001471082556	0.530922688196588	0.941061750942672	0.410166467813532	0.659939359898057
olink_IL2_P60568_OID00495	0.721741358957216	0.421027914050523	0.922225069778665	0.697305902242255	0.843534143223211
olink_CXCL1_P09341_OID00496	0.000312155264261412	0.0421289181620202	0.00957276143734997	1.30779034281636e-05	0.0002673704700869
olink_TSLP_Q969D9_OID00497	0.951242179746322	0.767364552678927	0.980407645012657	0.75985362504302	0.879327465458589
olink_CCL4_P13236_OID00498	0.710496090051251	0.540881145767448	0.922225069778665	0.379631499909309	0.64092598635561
olink_CD6_P30203_OID00499	0.644900281999232	0.349842927510726	0.912781937598913	0.397331271683892	0.65863922513366
olink_SCF_P21583_OID00500	0.00675575765092711	0.2319142927781	0.0956199544438914	2.59000486039655e-07	7.94268157188276e-06
olink_IL18_Q14116_OID00501	0.736456848817186	0.919324568309617	0.930650719389067	0.894986926277388	0.945113668257859
olink_SLAMF1_Q13291_OID00502	0.482340819892058	0.569328594768808	0.907579461752189	0.277731732339852	0.532319153651383
olink_TGF-alpha_P01135_OID00503	0.353546808522195	0.920223648506238	0.83959876095446	0.22791862174417	0.465966960010303
olink_MCP-4_Q99616_OID00504	0.616526521371228	0.433461879985352	0.907579461752189	0.770294216086598	0.880336246956112
olink_CCL11_P51671_OID00505	0.543649760265668	0.70117728837942	0.907579461752189	0.021149972487886	0.0884453394947959
olink_TNFSF14_O43557_OID00506	0.817479308612354	0.715820603394449	0.960469886939763	0.342431362722465	0.599380576427434
olink_FGF-23_Q9GZV9_OID00507	0.0771853863206434	0.0420869625081485	0.402075884591361	0.102616158829242	0.290482664993547
olink_IL-10RA_Q13651_OID00508	0.106815492813781	0.207077700695015	0.467009331651798	0.223759405598011	0.463038599688565
olink_FGF-5_P12034_OID00509	0.622050805238581	0.854538219873421	0.907579461752189	0.575392781307266	0.746572113114126
olink_MMP-1_P03956_OID00510	0.295723115086538	0.372677364679635	0.785407208873699	0.0625617576202025	0.204634298965053
olink_LIF-R_P42702_OID00511	0.640887826685313	0.352871415269208	0.912781937598913	0.665420778767877	0.810843862869466
olink_FGF-21_Q9NSA1_OID00512	0.455232810514401	0.667141518719816	0.907579461752189	0.941637146025704	0.962562415937387
olink_CCL19_Q99731_OID00513	0.00355904662101372	0.951515112856732	0.0595331434787749	7.4861283865088e-09	3.44361905779405e-07
olink_IL-15RA_Q13261_OID00514	0.115203218388455	0.769068278398211	0.471053159632794	0.108482399367183	0.295565147840814
olink_IL-10RB_Q08334_OID00515	0.0435058352973477	0.060492534860857	0.296484210915258	0.0361393426628747	0.135706919387121
olink_IL-22 RA1_Q8N6P7_OID00516	0.559682182970403	0.659882706623755	0.907579461752189	0.324438876039993	0.596967531913587
olink_IL-18R1_Q13478_OID00517	0.917238581578513	0.951055773336014	0.969953442588772	0.345295332072326	0.599380576427434
olink_PD-L1_Q9NZQ7_OID00518	0.874940215354077	0.745774059270247	0.960469886939763	0.732830495714016	0.863437113501176
olink_Beta-NGF_P01138_OID00519	0.971634033829775	0.853220635179758	0.987738465329716	0.971096494245036	0.976403032464955
olink_CXCL5_P42830_OID00520	0.0334998553477628	0.140794607139141	0.237075899384168	0.0396251761165714	0.142192197023416
olink_TRANCE_O14788_OID00521	0.206513429799686	0.710177565998632	0.622925755461348	0.0195891864956753	0.0858192932191491
olink_HGF_P14210_OID00522	0.906545581224751	0.661007274944702	0.968047756278349	0.710585827171727	0.843534143223211
olink_IL-12B_P29460_OID00523	0.379511237681854	0.199110137130053	0.841326117270616	0.336146051738426	0.599380576427434
olink_IL-24_Q13007_OID00524	0.63135962556674	0.462522174875505	0.907579461752189	0.566806352738211	0.746572113114126
olink_IL13_P35225_OID00525	0.882924900315763	0.698229556316717	0.960469886939763	0.611079556473352	0.767903707956783
olink_ARTN_Q5T4W7_OID00526	0.816490466759718	0.675366254144879	0.960469886939763	0.934471291973885	0.960573842029021
olink_MMP-10_P09238_OID00527	0.863691616527406	0.627437810277824	0.960469886939763	0.468735862276652	0.699498453643027
olink_IL10_P22301_OID00528	0.182864366139671	0.68681236323112	0.591908729840341	0.181592310899663	0.417662315069224
olink_TNF_P01375_OID05548	0.301711661853599	0.931739314006904	0.785407208873699	0.0240300525646046	0.0982562149308278
olink_CCL23_P55773_OID00530	0.926397522146841	0.751249183278432	0.974040823285821	0.305619306922672	0.573815841569098
olink_CD5_P06127_OID00531	0.0126079168965315	0.474124869383339	0.136092398018328	2.69892312522968e-05	0.000451456231856602
olink_CCL3_P10147_OID00532	0.83897983832291	0.684834366390925	0.960469886939763	0.439922818747423	0.683479291474715
olink_Flt3L_P49771_OID00533	0.0226685773862788	0.109545764484149	0.184167294993058	0.00106404828239223	0.0081577034983404
olink_CXCL6_P80162_OID00534	0.000149858900627682	0.0508190192422404	0.00562698353029641	1.94384499718632e-05	0.000357667479482283
olink_CXCL10_P02778_OID00535	6.69871162044632e-05	0.522088658177017	0.00410854312720708	1.61888875973243e-10	9.92918439302555e-09
olink_4E-BP1_Q13541_OID00536	0.571207516681448	0.558228684108665	0.907579461752189	0.403359285856651	0.659939359898057
olink_IL-20_Q9NYY1_OID00537	0.978364013280206	0.845505131289478	0.989115266173395	0.925997448826955	0.957210845978425
olink_SIRT2_Q8IXJ6_OID00538	0.542850683556306	0.720278145935838	0.907579461752189	0.202232799968806	0.442986133265004
olink_CCL28_Q9NRJ3_OID00539	0.86724109959422	0.937612174778824	0.960469886939763	0.865252398782572	0.936754545077706
olink_DNER_Q8NFT8_OID01213	0.487114499332449	0.669581436766243	0.907579461752189	0.619065931292147	0.769649536201047
olink_EN-RAGE_P80511_OID00541	0.713163681661584	0.817484529706143	0.922225069778665	0.49269108717892	0.699498453643027
olink_CD40_P25942_OID00542	0.858141775683302	0.580952952742265	0.960469886939763	0.613488288421995	0.767903707956783
olink_IL33_O95760_OID00543	0.520819107256987	0.50782261682664	0.907579461752189	0.479374202596423	0.699498453643027
olink_IFN-gamma_P01579_OID05547	0.000854680310978297	0.100609211981961	0.0196576471525008	0.000123340905581744	0.00141842041419005
olink_FGF-19_O95750_OID00545	0.606853162864555	0.513462455007638	0.907579461752189	0.475199872094412	0.699498453643027
olink_IL4_P05112_OID00546	0.30733325564623	0.308930292710928	0.785407208873699	0.272411353619837	0.528768211438326
olink_LIF_P15018_OID00547	0.846089198302921	0.570080367174371	0.960469886939763	0.758820103359244	0.879327465458589
olink_NRTN_Q99748_OID00548	0.658573579262555	0.744983816719087	0.922225069778665	0.290269740591793	0.55061476565866
olink_MCP-2_P80075_OID00549	1.02036559823176e-07	0.880770810450228	1.87747270074644e-05	1.17276977530072e-15	2.15789638655332e-13
olink_CASP-8_Q14790_OID00550	0.835861189191705	0.613755950794519	0.960469886939763	0.575993665787354	0.746572113114126
olink_CCL25_O15444_OID00551	0.0698224523847358	0.0216220989736512	0.385161249010356	0.0270445411345603	0.108178164538241
olink_CX3CL1_P78423_OID00552	0.217114613264079	0.303906724687467	0.64434014259017	0.0044624160018083	0.0283132601494044
olink_TNFRSF9_Q07011_OID00553	0.0233939056938022	0.165283623177907	0.184167294993058	9.58689688728251e-05	0.00117599268483999
olink_NT-3_P20783_OID00554	0.801075058034782	0.507431105056488	0.960469886939763	0.804370043420482	0.908000539812078
olink_TWEAK_O43508_OID00555	0.110217872348083	0.253995246533161	0.467009331651798	0.0866191253570375	0.257063210737015
olink_CCL20_P78556_OID00556	0.557485530651661	0.289412300491909	0.907579461752189	0.422322608540093	0.669891034236009
olink_ST1A1_P50225_OID00557	0.451700800237736	0.574936781827824	0.907579461752189	0.442032802638539	0.683479291474715
olink_STAMBP_O95630_OID00558	0.777398837735251	0.885220743308046	0.941061750942672	0.412462099936285	0.659939359898057
olink_IL5_P05113_OID00559	0.694875704126535	0.48139114928255	0.922225069778665	0.530633351321281	0.722204309880901
olink_ADA_P00813_OID00560	0.882465169829603	0.978312174644532	0.960469886939763	0.650724931144343	0.798222582203728
olink_TNFB_P01374_OID00561	0.292192821980423	0.861660447893953	0.785407208873699	0.153688545045939	0.377049230512704
olink_CSF-1_P09603_OID00562	0.0696031616847035	0.941452234038342	0.385161249010356	0.014110894289572	0.0691319093912626
olink_PPP1R9B_Q96SB3_OID00936	0.956281833381526	0.832772038110152	0.980407645012657	0.99596358519523	0.99596358519523
olink_GLB1_P16278_OID00937	0.748566882986858	0.467328310954978	0.930650719389067	0.767588072570379	0.880336246956112
olink_PSIP1_O75475_OID00938	0.539132629857881	0.394303469807795	0.907579461752189	0.0845283675057086	0.257063210737015
olink_ZBTB16_Q05516_OID00939	0.468579332854671	0.21895814283926	0.907579461752189	0.505061250401802	0.704024773287361
olink_IRAK4_Q9NWZ3_OID00940	0.498454970659229	0.349361178005433	0.907579461752189	0.448652471535692	0.687933789688062
olink_TPSAB1_Q15661_OID00941	0.570671718275028	0.315319150656861	0.907579461752189	0.8942276023584	0.945113668257859
olink_HCLS1_P14317_OID00942	0.943475291461525	0.741672416842432	0.980407645012657	0.495936203279516	0.699498453643027
olink_CNTNAP2_Q9UHC6_OID00943	0.110724489170006	0.166143816872912	0.467009331651798	0.167049693050022	0.404436098963211
olink_CLEC4G_Q6UXB4_OID00944	0.272356462937731	0.568174438723483	0.747964017620037	0.176809134344596	0.41522540770553
olink_IRF9_Q00978_OID00945	0.628385176133088	0.871233829977673	0.907579461752189	0.736737102280895	0.863437113501176
olink_EDAR_Q9UNE0_OID00946	0.693260013437904	0.393445519262964	0.922225069778665	0.310953151831048	0.577933130675887
olink_IL6_P05231_OID00947	0.0230559436720943	0.0457370189072738	0.184167294993058	5.37569197545437e-05	0.000779611516498517
olink_DGKZ_Q13574_OID00948	0.1073175868796	0.138410962515163	0.467009331651798	0.273005326557831	0.528768211438326
olink_CLEC4C_Q8WTT0_OID00949	0.181123288859348	0.354264216539505	0.591908729840341	0.000573526900497223	0.0050251880805471
olink_IRAK1_P51617_OID00950	0.612600393776561	0.610388137026694	0.907579461752189	0.708373105418624	0.843534143223211
olink_CLEC4A_Q9UMR7_OID00951	0.00053058290416983	0.00177208059236241	0.0139467506238927	0.000395548633022034	0.00363904742380271
olink_PRDX1_Q06830_OID00952	0.758774899068972	0.547887314344035	0.935694274870593	0.867385702993492	0.936754545077706
olink_PRDX3_P30048_OID00953	0.195726309895621	0.529154557498763	0.610400695267699	0.127417681013063	0.325622962588938
olink_FGF2_P09038_OID00954	0.374169013034053	0.99993059210105	0.83959876095446	0.0153067620060998	0.0722165181826249
olink_PRDX5_P30044_OID00955	0.703323706351727	0.405848621861001	0.922225069778665	0.633299859817203	0.782061571854801
olink_DPP10_Q8N608_OID00956	0.5425877408275	0.642714135959525	0.907579461752189	0.0448194107981792	0.152717992349351
olink_TRIM5_Q9C035_OID00957	0.720948542561296	0.799240371793104	0.922225069778665	0.913547517911709	0.955072405089514
olink_DCTN1_Q14203_OID00958	0.416029020773054	0.257163081432508	0.890108602584208	0.21071465121361	0.450831346782607
olink_ITGA6_P23229_OID00959	0.182683046689924	0.549002502506065	0.591908729840341	0.101598787961732	0.290482664993547
olink_CDSN_Q15517_OID00960	0.319392006337661	0.250073747788324	0.800831289056799	0.178276126134439	0.41522540770553
olink_GALNT3_Q14435_OID00961	0.910175336066056	0.991870994893491	0.968047756278349	0.875661857355247	0.936754545077706
olink_FXYD5_Q96DB9_OID00962	0.863237715564071	0.70080206185472	0.960469886939763	0.860799776108081	0.936754545077706
olink_TRAF2_Q12933_OID00963	0.662885981371965	0.405849109310911	0.922225069778665	0.604412939618767	0.766979178550712
olink_TRIM21_P19474_OID00964	0.512480500556748	0.69358648858785	0.907579461752189	0.26699613700849	0.528250421608196
olink_LILRB4_Q8NHJ6_OID00965	0.739067211483128	0.854478892010867	0.930650719389067	0.122879363023667	0.322997182805068
olink_NTF4_P34130_OID00966	0.720029201280384	0.984813048871569	0.922225069778665	0.563807116022104	0.746572113114126
olink_KRT19_P08727_OID00967	0.428124344499321	0.519449078568249	0.899988699544427	0.233277715807025	0.47168241437904
olink_ITM2A_O43736_OID00968	0.167249300359988	0.182958023977168	0.591908729840341	0.379678981047617	0.64092598635561
olink_HNMT_P50135_OID00969	0.62282086275756	0.557879785393973	0.907579461752189	0.189721088494044	0.430971361517335
olink_CCL11_P51671_OID00970	0.959094435338469	0.956712494831782	0.980407645012657	0.328452331610612	0.598368604122303
olink_MILR1_Q7Z6M3_OID00971	0.189897843282973	0.433610689823813	0.602434537311501	0.194829877344026	0.437179236967084
olink_EGLN1_Q9GZT9_OID00972	0.0128240048494828	0.127016627647223	0.136092398018328	0.00506054691329954	0.0310380210682372
olink_NFATC3_Q12968_OID00973	0.507742346529205	0.421219695921642	0.907579461752189	0.1352723361369	0.340960408893007
olink_LY75_O60449_OID00974	0.604649584730816	0.768083437036097	0.907579461752189	0.42980609104203	0.675934365399432
olink_EIF5A_P63241_OID00975	0.0786670208983097	0.156484157146394	0.402075884591361	0.000985368935707705	0.00788295148566164
olink_EIF4G1_Q04637_OID00976	0.893495729796835	0.644539551998306	0.961422305746302	0.580216370518044	0.746572113114126
olink_CD28_P10747_OID00977	0.701966268958632	0.900164794425147	0.922225069778665	0.206448486899538	0.446900253994294
olink_PTH1R_Q03431_OID00978	0.175850737758274	0.822508388279214	0.591908729840341	0.215923496066405	0.456665784784121
olink_BIRC2_Q13490_OID00979	0.183363030439671	0.67360057726583	0.591908729840341	0.198679169628223	0.440445388091483
olink_HSD11B1_P28845_OID00980	0.679586178653717	0.390265907122725	0.922225069778665	0.898885282310464	0.945113668257859
olink_NF2_P35240_OID00981	0.60846064495375	0.917552001832387	0.907579461752189	0.490219347103959	0.699498453643027
olink_PLXNA4_Q9HCM2_OID00982	0.11167614452543	0.0394718538893881	0.467009331651798	0.142403522108365	0.35408443335053
olink_SH2B3_Q9UQQ2_OID00983	0.371901369488836	0.26459197091336	0.83959876095446	0.408557598262465	0.659939359898057
olink_FCRL3_Q96P31_OID00984	0.586085421128142	0.59186680224624	0.907579461752189	0.465533811405335	0.699498453643027
olink_CKAP4_Q07065_OID00985	0.995902532558319	0.989192939310873	0.995902532558319	0.343296020195117	0.599380576427434
olink_JUN_P05412_OID00986	0.240366186504611	0.156408719903169	0.680421204874591	0.0142772421568912	0.0691319093912626
olink_HEXIM1_O94992_OID00987	0.545406284181783	0.64670008268589	0.907579461752189	0.518866087298579	0.717829774909312
olink_CLEC4D_Q8WXI8_OID00988	0.599031064784123	0.650738714630535	0.907579461752189	0.117833198242748	0.314221861980663
olink_PRKCQ_Q04759_OID00989	0.238897825565695	0.229988976593994	0.680421204874591	0.572323149195657	0.746572113114126
olink_MGMT_P16455_OID00990	0.473912259845332	0.869227458131789	0.907579461752189	0.000196214063439794	0.00200574375960679
olink_TREM1_Q9NP99_OID00991	0.00606019482891631	0.170630339341858	0.0929229873767168	5.50812484482648e-05	0.000779611516498517
olink_CXADR_P78310_OID00992	0.539814610795495	0.467665194084951	0.907579461752189	0.0663415161479682	0.206895575783494
olink_IL10_P22301_OID00993	0.0899799208587827	0.170949665138895	0.447467714540973	0.013441169693282	0.0691319093912626
olink_SRPK2_P78362_OID00994	0.0627793698246155	0.208517951747311	0.385161249010356	0.0141203167739886	0.0691319093912626
olink_KLRD1_Q13241_OID00995	0.3035019288847	0.623980428644487	0.785407208873699	0.0854985885515127	0.257063210737015
olink_BACH1_O14867_OID00996	0.389132861517177	0.246253466846766	0.842358194343065	0.787257200400014	0.894168672059275
olink_PIK3AP1_Q6ZUJ8_OID00997	0.745643297623852	0.882878362981582	0.930650719389067	0.872161398989803	0.936754545077706
olink_SPRY2_O43597_OID00998	0.386985006853551	0.953465154353939	0.842358194343065	0.339279515926687	0.599380576427434
olink_STC1_P52823_OID00999	0.538761142517815	0.766814587849803	0.907579461752189	0.0171822540973781	0.0771106037540872
olink_ARNT_P27540_OID01000	0.518500153761193	0.511013308738657	0.907579461752189	0.239020511954529	0.478041023909057
olink_FAM3B_P58499_OID01001	0.163492563157566	0.0873408172455757	0.591908729840341	0.0342310364654228	0.131218973117454
olink_SH2D1A_O60880_OID01002	0.000152907161149359	0.00134428861992567	0.00562698353029641	0.000680979384672498	0.00569546394453362
olink_ICA1_Q05084_OID01003	0.369069384690016	0.187127128540763	0.83959876095446	0.384308285837037	0.642842950854679
olink_DFFA_O00273_OID01004	0.995877564482879	0.933118417643931	0.995902532558319	0.947923044571904	0.963634476249891
olink_DCBLD2_Q96PD2_OID01005	0.0639995861651711	0.997443035872072	0.385161249010356	0.0116740656735118	0.0631772965860637
olink_FCRL6_Q6DN72_OID01006	0.0190115469888939	0.0411281081652306	0.174906232297824	0.00429618691127898	0.0282320854169762
olink_NCR1_O76036_OID01007	0.165915988514494	0.771364779804765	0.591908729840341	0.0658555661695156	0.206895575783494
olink_CXCL12_P48061_OID01008	0.00747729764711698	0.0839748372314144	0.0982730547906803	0.00692830281441218	0.0411228296081239
olink_AREG_P15514_OID01009	0.355979580798673	0.663274688468118	0.83959876095446	0.481148391583221	0.699498453643027
olink_IFNLR1_Q8IU57_OID01010	0.16849926823103	0.779232935414047	0.591908729840341	0.105346104323613	0.293692169629466
olink_DAPP1_Q9UN19_OID01011	0.887390656411738	0.626059097899392	0.960469886939763	0.533803185564144	0.722204309880901
olink_PADI2_Q9Y2J8_OID01012	0.132564681692298	0.263841884073728	0.530258726769192	0.028555269359207	0.111790841746683
olink_SIT1_Q9Y3P8_OID01013	0.0133133867626625	0.223286854686827	0.136092398018328	0.000148319070976681	0.00160533582704173
olink_MASP1_P48740_OID01014	0.0937114886341452	0.108121731115028	0.453760892333756	7.54317951384828e-05	0.000991389307534345
olink_LAMP3_Q9UQV4_OID01015	0.685922779385987	0.393643560616619	0.922225069778665	0.531645620286082	0.722204309880901
olink_CLEC7A_Q9BXN2_OID01016	0.825933918246657	0.537162200471574	0.960469886939763	0.858793223171355	0.936754545077706
olink_CLEC6A_Q6EIG7_OID01017	0.030550321832209	0.0148327665781491	0.224850368685058	0.00740972366544646	0.0426059110763172
olink_DDX58_O95786_OID01018	0.596665174837027	0.482758573552804	0.907579461752189	0.492673863599077	0.699498453643027
olink_IL12RB1_P42701_OID01019	0.617255107286709	0.824200615240118	0.907579461752189	0.00900895036048157	0.0502317232220791
olink_TANK_Q92844_OID01020	0.499210585414922	0.967237250451403	0.907579461752189	0.49801248601759	0.699498453643027
olink_ITGA11_Q9UKX5_OID01021	0.0175484874825005	0.269847266444216	0.169943247198952	1.74605393012265e-06	4.58962747346525e-05
olink_KPNA1_P52294_OID01022	0.342840010641642	0.174239312785093	0.830033709974502	0.923984064922441	0.957210845978425
olink_LAG3_P18627_OID01023	0.234917328242344	0.362283005481542	0.680421204874591	0.126635244192822	0.325622962588938
olink_IL5_P05113_OID01024	0.525705116226155	0.277511407875005	0.907579461752189	0.839145320582805	0.936754545077706
olink_CD83_Q01151_OID01025	0.0711711003606093	0.181019342460944	0.385161249010356	0.109230598115083	0.295565147840814
olink_ITGB6_P18564_OID01026	0.200426127494759	0.144906561831286	0.614640124317261	0.0633921469620001	0.204634298965053
olink_BTN3A2_P78410_OID01027	0.0964978020784102	0.17919957983277	0.455271681600705	0.0401847513327045	0.142192197023416
IgG_antibody_value	1.03142277553878e-13	0.411870530954781	1.03142277553878e-13	2.61659213231089e-14	2.61659213231089e-14
